# Supplementary material
Source: publisher site journal article supplement (https://www.dovepress.com/article/577853)
Supplement: Supplementary file 1 [file 577853%20supplementary%20figure%20S1.pdf]

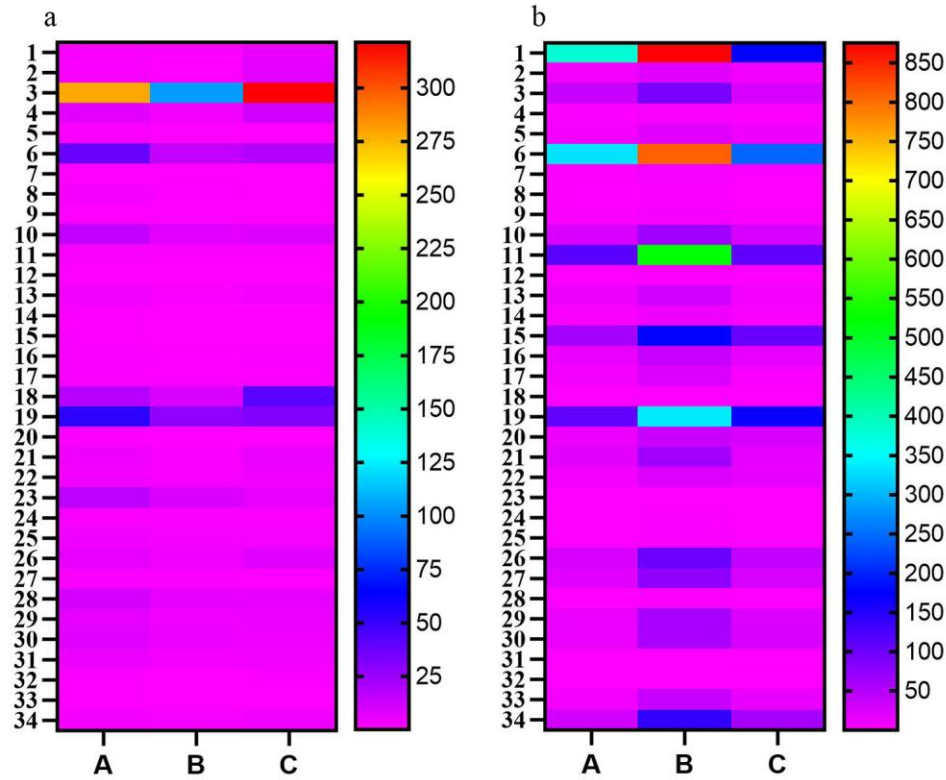

**Supplementary Figure 1. Comparison of Gene Expression among Three Groups.**

Figure S1a depicts that emollient upregulates some genes which are downregulated by low humidity; S1b shows that emollient downregulates some genes which are upregulated by low humidity. A, Normal controls; B, Mice were exposed to low humidity; C, Mice were exposed to low humidity and treated with topical emollient.
